# Supplementary material
Source: PubMed Central journal article supplement (PMC8679671)

**5 Day Storage**      **Post Storage GPVI Levels**

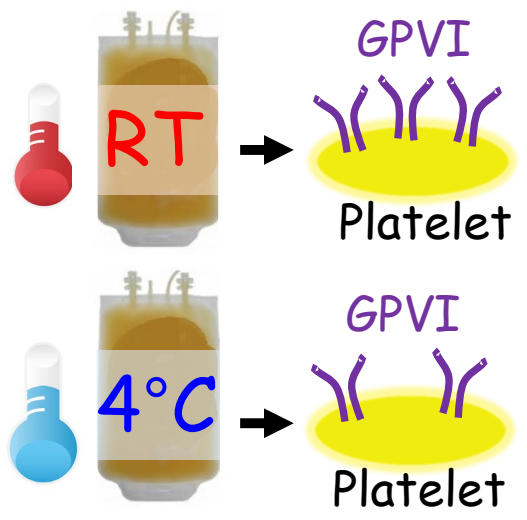

**Post In Vitro "Transfusion"**

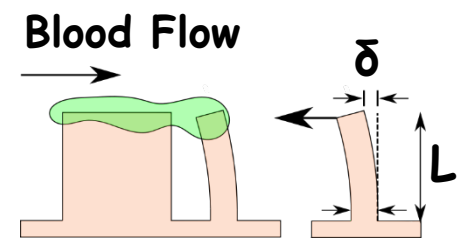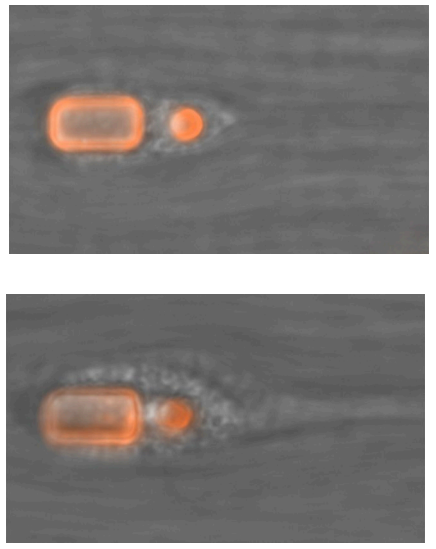

**Post Transfusion in Humans on DAPT**

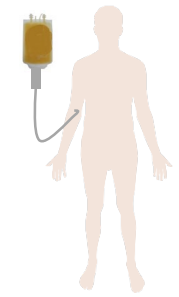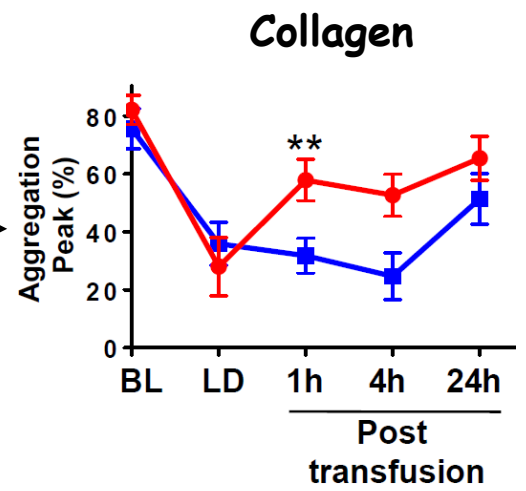

■ 4°C ● RT

**Post Transfusion in Mice**

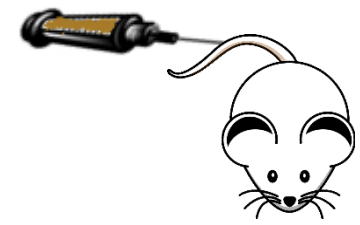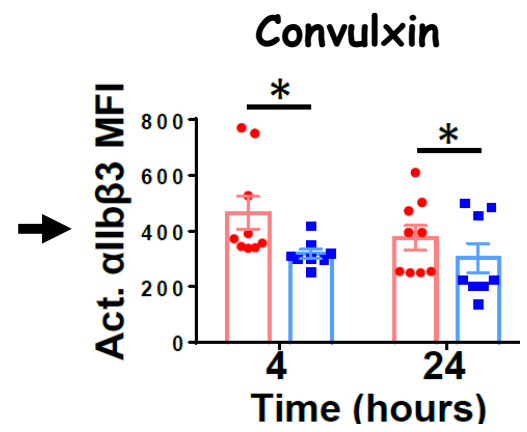

Supplement: advancesADV2021004692-suppl4.pdf [file advancesADV2021004692-suppl4.pdf]
